# Supplementary material for: Probing the molecular weight dependent intramolecular interactions in single molecules of PCDTBT
Source: Royal Society of Chemistry journal article supplement (doi:10.1039/c7tc02255g), 2017-01-01
Supplement: c7tc02255g1.pdf [file c7tc02255g1.pdf]

## Electronic Supplementary Information

### Probing the molecular weight dependent interactions in single molecules of PCDTBT

*Beiyue Shao and David A. Vanden Bout<sup>†</sup>*

Center for Nano- and Molecular Science and Technology, Department of Chemistry, The University of Texas at Austin, Austin, Texas 78712, United States

<sup>†</sup>Email: [dvandenbout@cm.utexas.edu](mailto:dvandenbout@cm.utexas.edu)

**S1.** Modulation Depths Histograms

**S2.** Energy distribution histograms of E at half height  $E_{\max}$

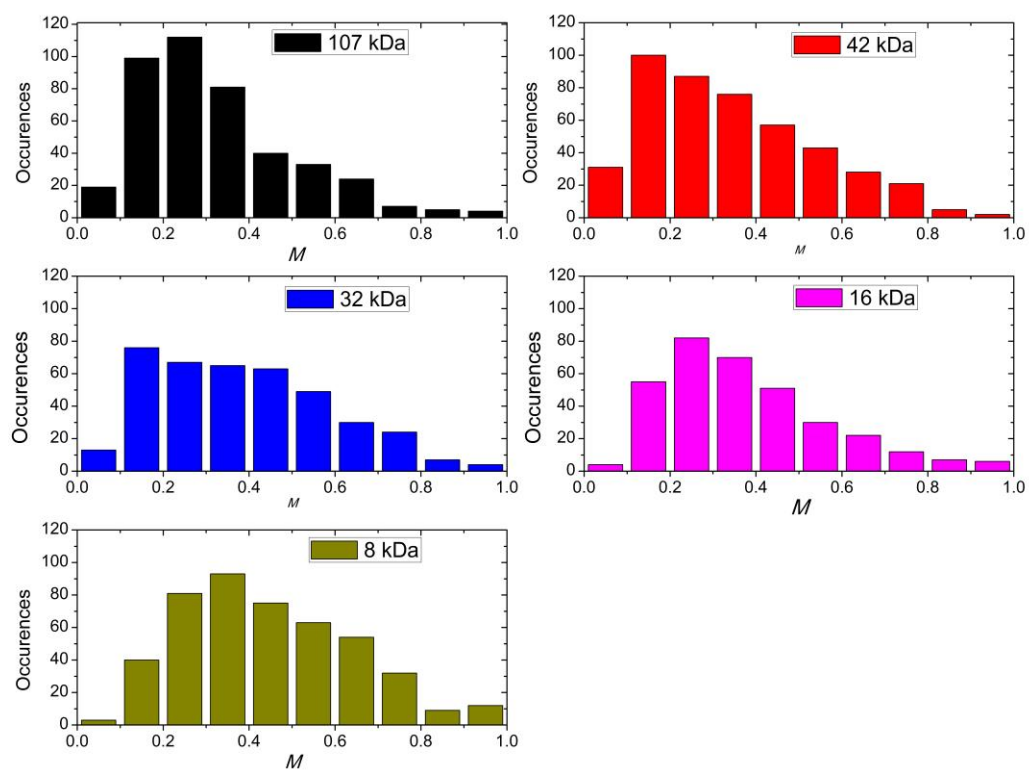

Figure S1. Histograms of modulation depths distribution of all PCDTBT polymers examined.

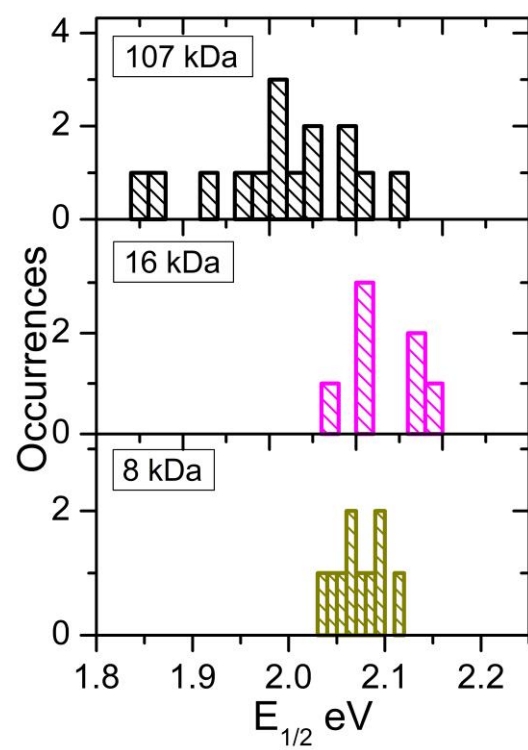

Figure S2. Analysis of  $E$  at half height  $E_{\max}$  on the blue edge for a subset of individual polymers show some vibronic structures
